# Supplementary material for: Abnormal electronic transport properties with Hall effect, magneto-resistivity, and phase diagram in CaFeAsF single crystals
Source: Royal Society of Chemistry journal article supplement (doi:10.1039/d4tc04600e), 2024-12-18
Supplement: d4tc04600e1.pdf [file d4tc04600e1.pdf]

## Supplementary Information

### Abnormal Electronic Transport Properties with Hall Effect, Magneto-resistivity, and Phase Diagram in CaFeAsF Single Crystal

Yongqiang Pan<sup>1,+</sup>, Nan Zhou<sup>1,+</sup>, Wei Zhou<sup>2,+</sup>, Tianyang Wang<sup>1</sup>, Qiang Hou<sup>3</sup>, Run Lv<sup>1</sup>, Ming Cheng<sup>1</sup>, Ruihuan Lan<sup>1</sup>, Yifan Deng<sup>1</sup>, Yu Zhao<sup>1</sup>, Lanxin Liu<sup>1</sup>, Wenhai Song<sup>1</sup>, Yue Sun<sup>3</sup>, Zhixiang Shi<sup>3</sup>, Wenjian Lu<sup>1</sup>, Xuan Luo<sup>1,\*</sup>, Yuping Sun<sup>1,4,5</sup>

<sup>1</sup>Key Laboratory of Materials Physics, Institute of Solid State Physics, HFIPS, Chinese Academy of Sciences, Hefei 230031, China

<sup>2</sup>Advanced Functional Materials Lab and Department of Physics, Changshu Institute of Technology, Changshu 215500, People's Republic of China

<sup>3</sup>School of Physics and Key Laboratory of the Ministry of Education, Southeast University, Nanjing 211189, China

<sup>4</sup>Anhui Province Key Laboratory of Low-Energy Quantum Materials and Devices, HFIPS, High Magnetic Field Laboratory, Chinese Academy of Sciences, Hefei, 230031, China

<sup>5</sup>Collaborative Innovation Center of Advanced Microstructures, Nanjing University, Nanjing, 210093, China

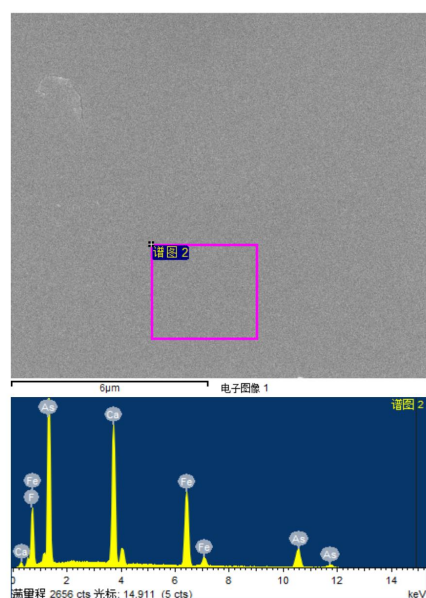

**Table S1**

| Elements percentage from EDS |            |            |
|------------------------------|------------|------------|
| Elements                     | Weight     | Atomicity  |
|                              | Percentage | Percentage |
| F                            | 16.46      | 37.33      |
| Ca                           | 18.95      | 20.37      |
| Fe                           | 26.20      | 20.22      |
| As                           | 38.39      | 22.08      |
| Total                        | 100.00     |            |

**Table S2**

| ICP atomic emission spectroscopy |       |                         |       |
|----------------------------------|-------|-------------------------|-------|
| Method Name:                     |       | 2024-Ca-Fe-As-2024.12.4 |       |
| Analyst Name:                    |       | admin                   |       |
| Acquire Date:                    |       | 2024/12/4 10:31:57      |       |
| Elem                             | Flags | Avg                     | Units |
| As1937                           |       | 2.445                   | ppm   |
| Ca3179                           |       | 2.191                   | ppm   |
| Fe2599                           |       | 1.970                   | ppm   |

SFig. 1. The surface picture of CaFeAsF single crystal. The elements percentage measured by EDS are shown in Table. S1. The elements percentage proportion measured by ICP are shown in Table. S2.

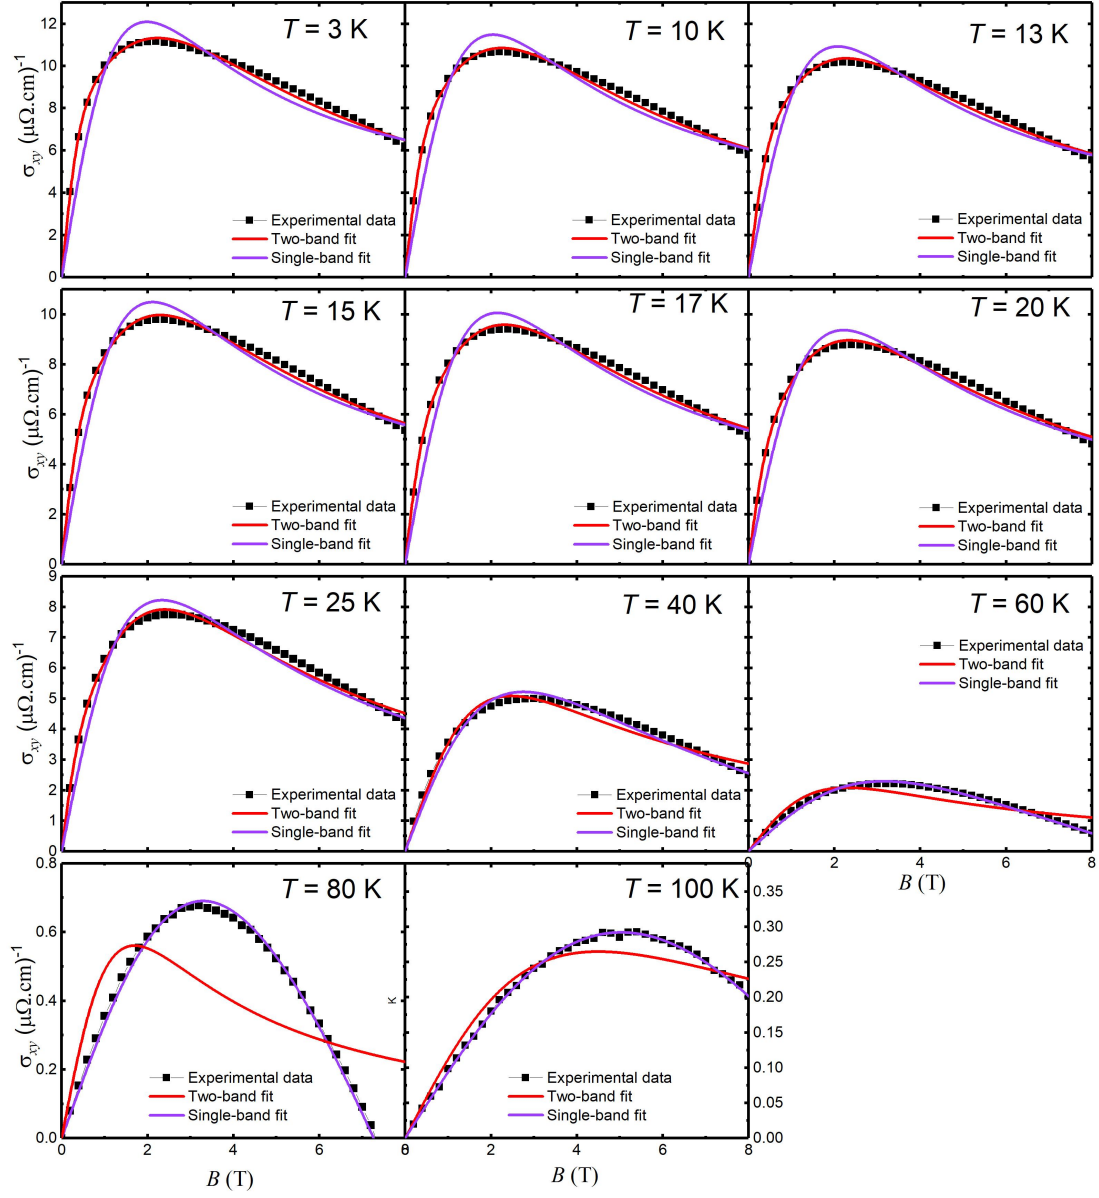

SFig.2. The magnetic field dependent Hall conductivity at  $T = 3$  K, 10 K, 13 K, 15 K, 17 K, 20 K, 25 K, 40 K, 60 K, 80 K, and 100 K. The fit results by two-band model and single-band model are plotted by red and purple solid curves, respectively.

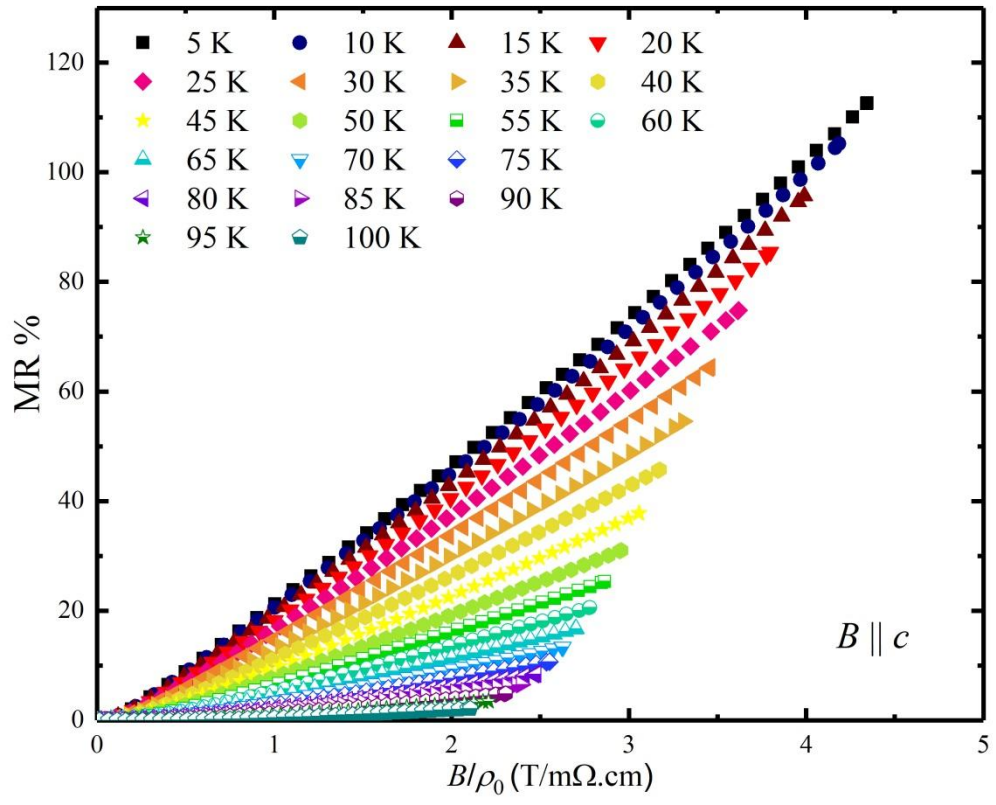

SFig.3. The MR% scaled by Kohler rule with  $H/\rho_0$ .

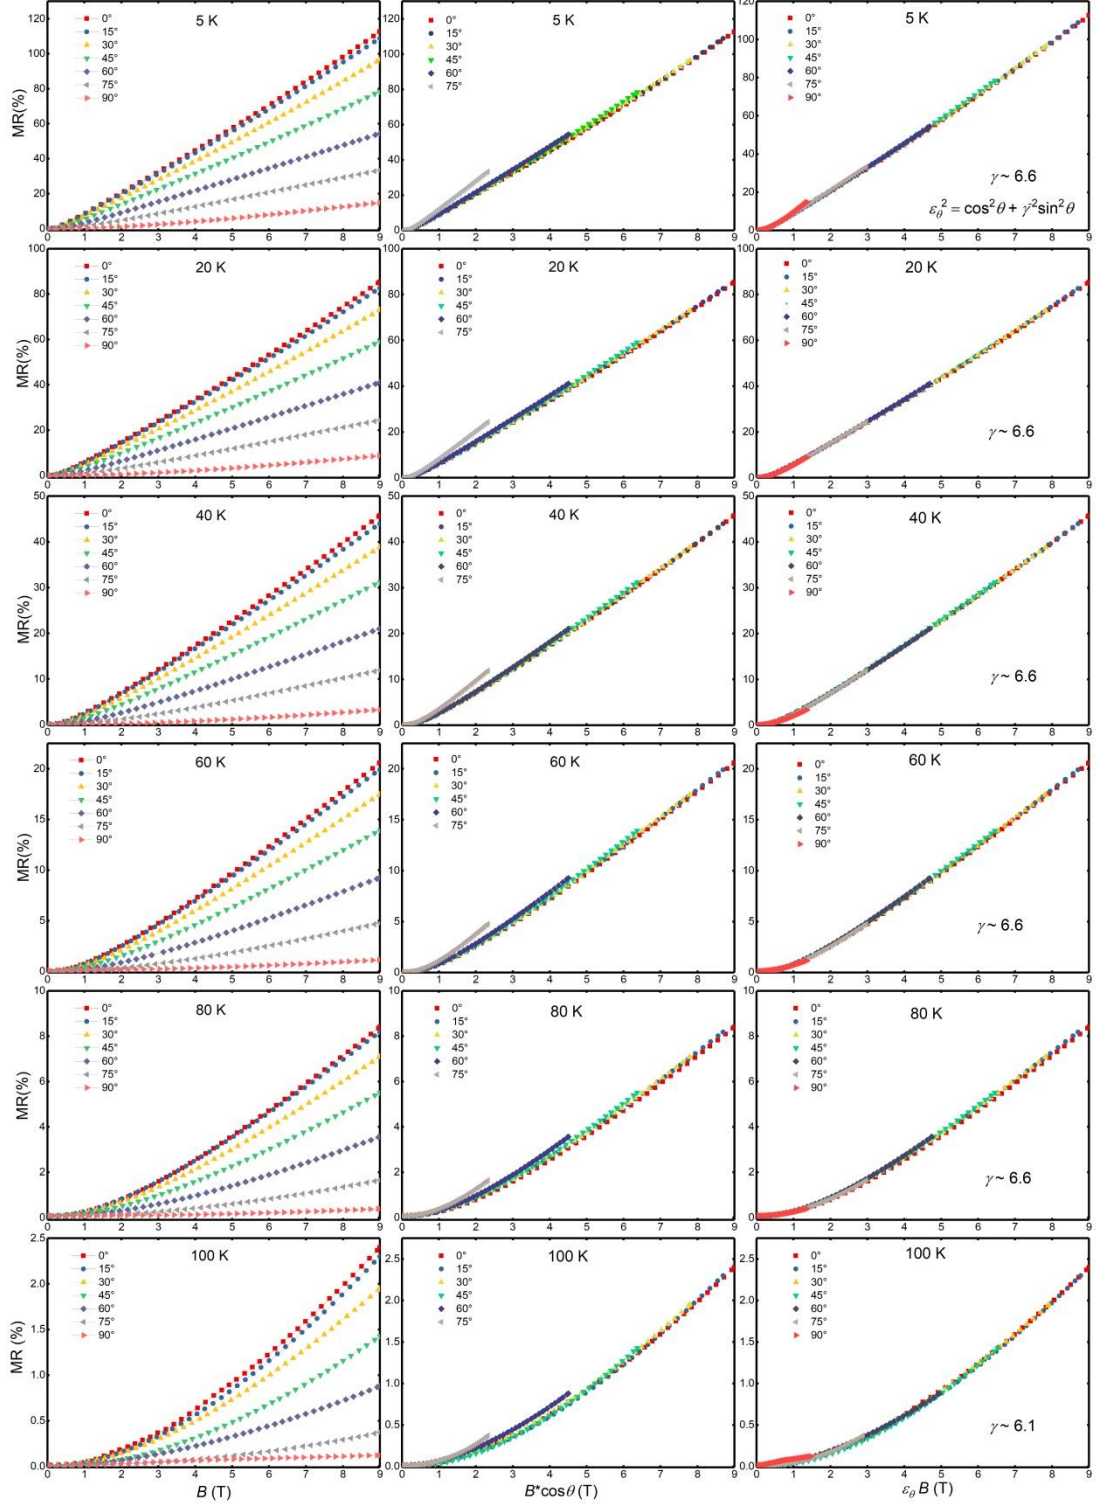

SFig. 4. The magnetic field dependent, angle-scaled  $B$  dependent, and anisotropy-scaled  $B$  dependent MR% with angles  $\theta = 0^\circ, 15^\circ, 30^\circ, 45^\circ, 60^\circ, 75^\circ$ , and  $90^\circ$ , which with temperatures at 5 K - 100 K.
